# Supplementary material
Source: PubMed Central journal article supplement (PMC1694635)
Supplement: NIHMS7839-supplement-supp1.pdf [file NIHMS7839-supplement-supp1.pdf]

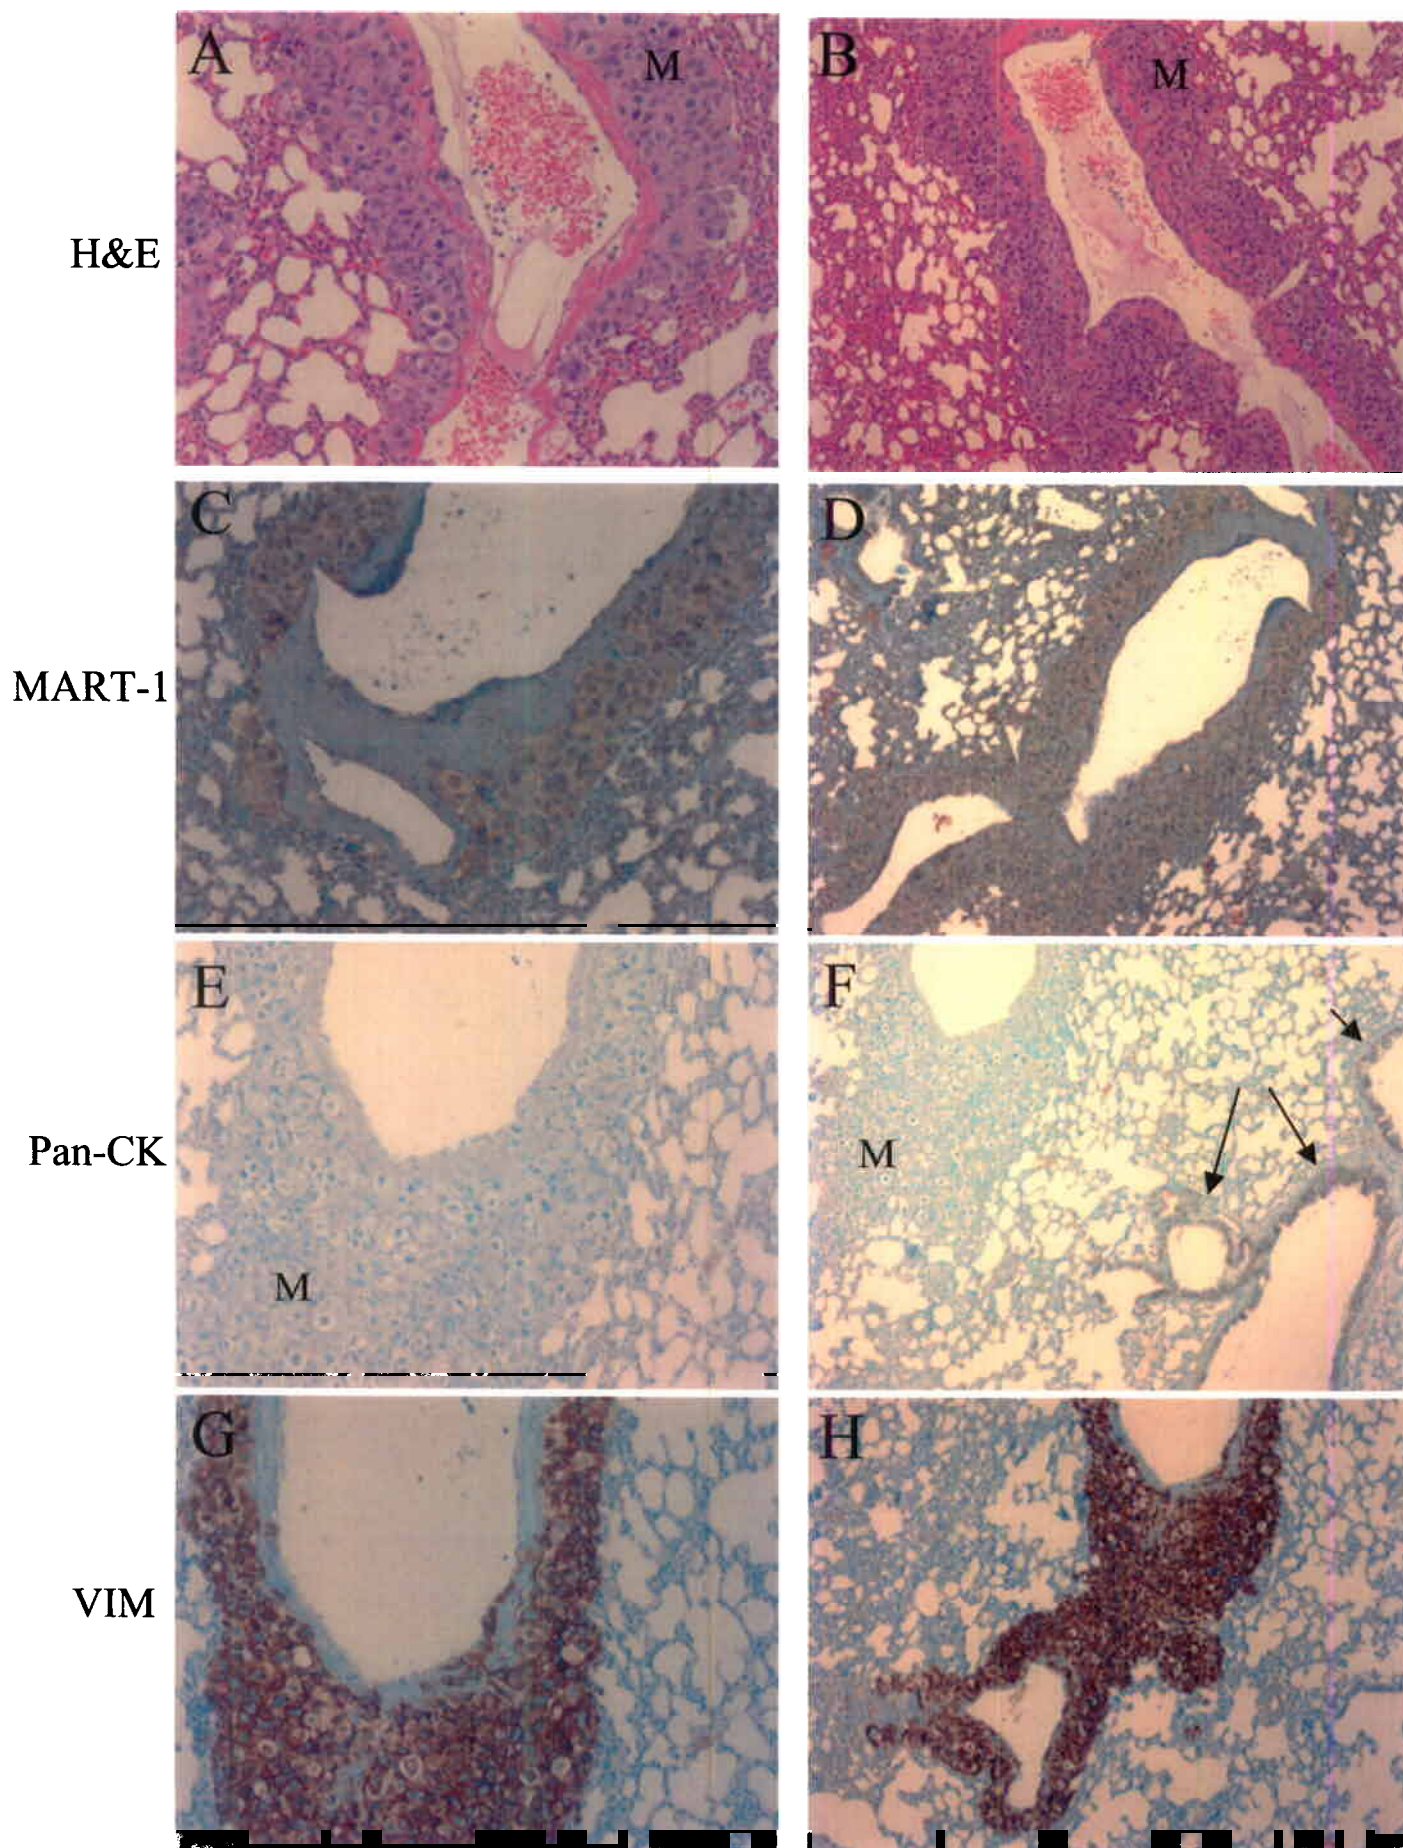

Figure S1

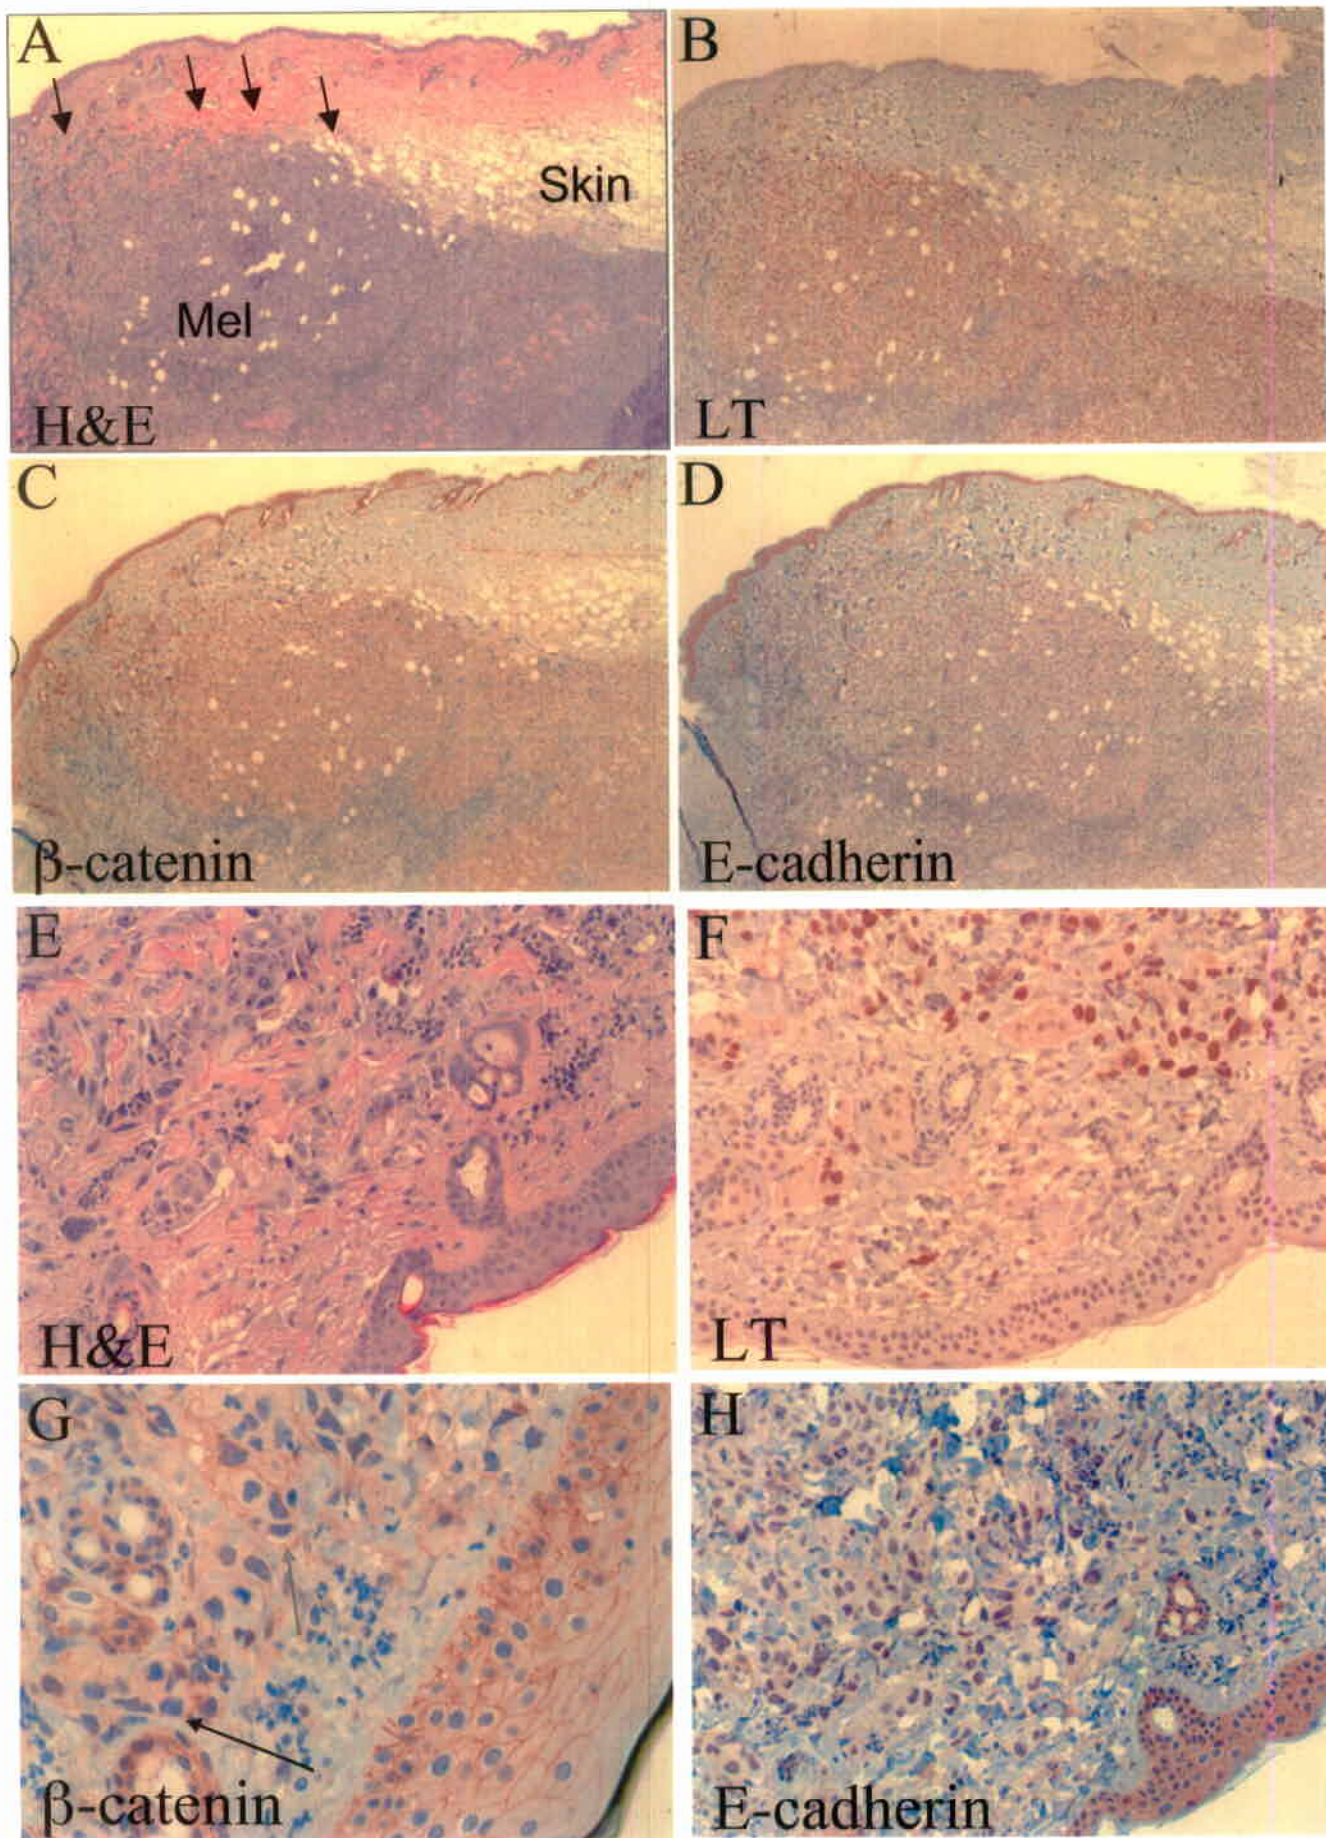

Figure S2

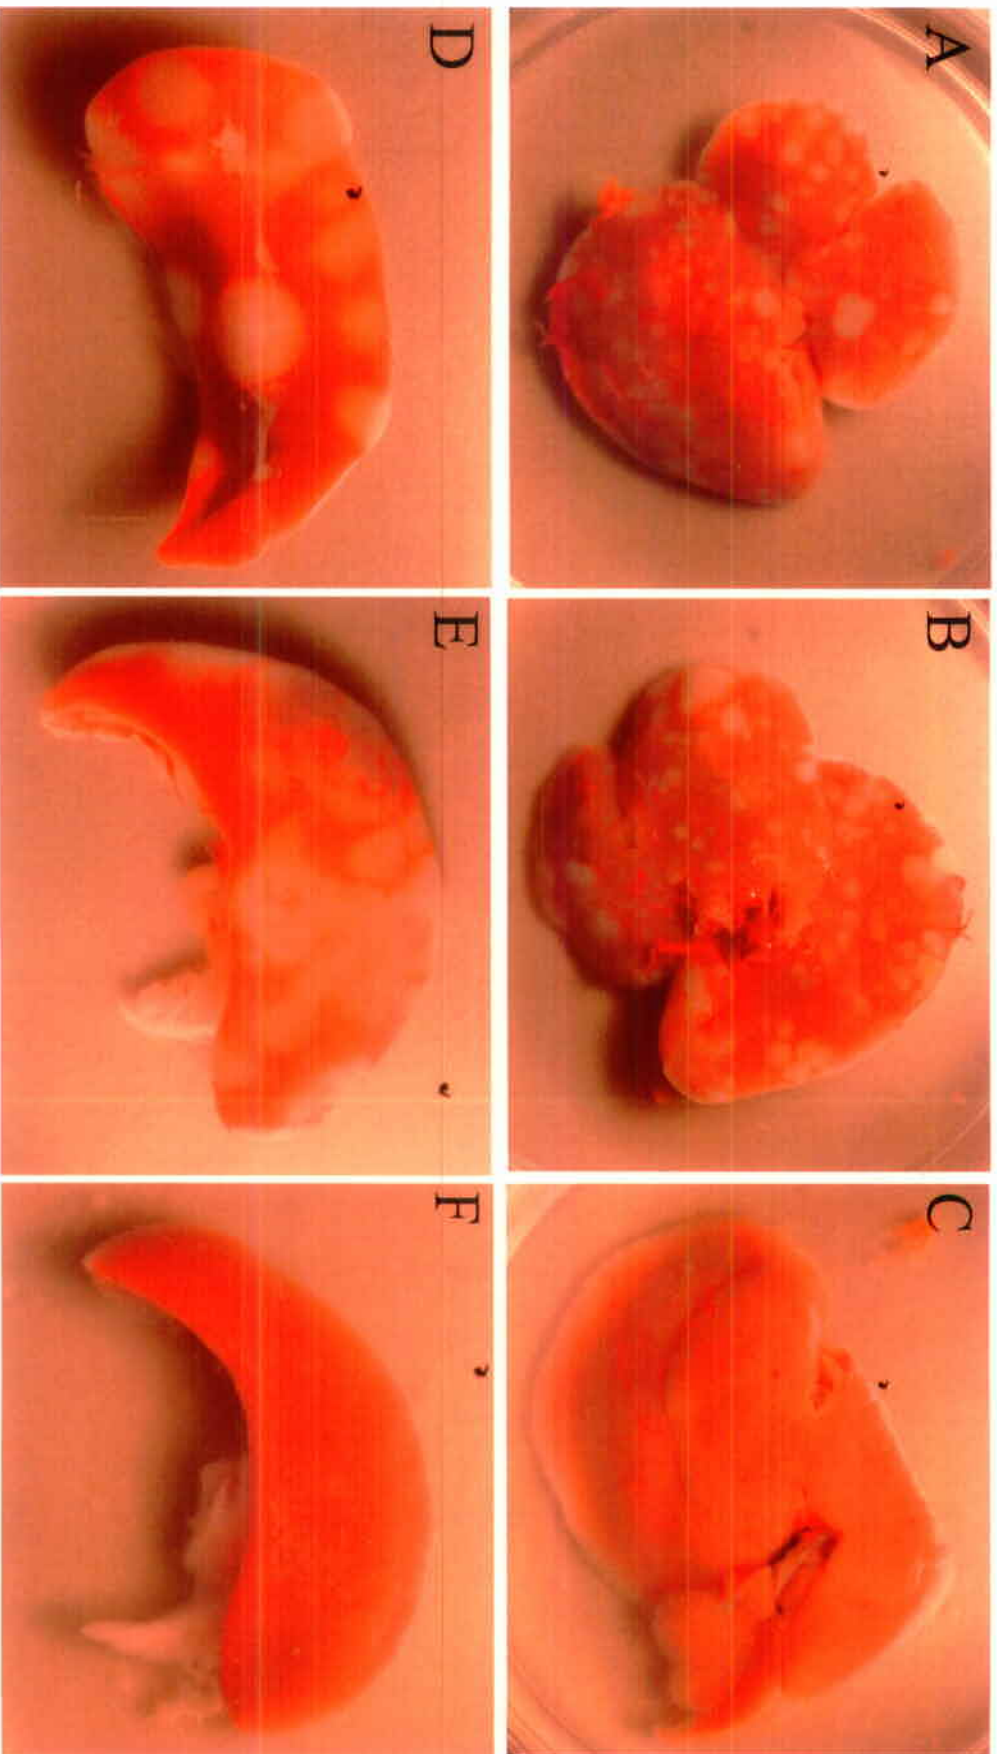

Figure S3

**Supplementary Table 1** Genes significantly correlated in their expression patterns withSlug in human nevus samples ( $p < 0.05$ ).**Genes significantly correlated with SLUGH in a dataset of 9 nevus samples**

| Probe       | Name                                                                                                | Correlation | p-value |
|-------------|-----------------------------------------------------------------------------------------------------|-------------|---------|
| 213139_at   | slug homolog, zinc finger protein (chicken)                                                         | 1           | 0       |
| 200984_s_at | CD59 antigen p18-20 (antigen identified by monoclonal antibodies 16.3A5, EJ16, EJ30, EL32 and G344) | 0.986642    | 0       |
| 211971_s_at | leucine-rich PPR-motif containing                                                                   | 0.984621    | 0       |
| 222171_s_at | PBX/knotted 1 homeobox 2                                                                            | 0.979982    | 0       |
| 204671_s_at | ankyrin repeat domain 6                                                                             | 0.96746     | 0.002   |
| 213122_at   | KIAA1750 protein                                                                                    | 0.962889    | 0.002   |
| 221524_s_at | Rag D protein                                                                                       | 0.950736    | 0.002   |
| 201735_s_at | chloride channel 3                                                                                  | 0.949528    | 0.002   |
| 204489_s_at | CD44 antigen (homing function and Indian blood group system)                                        | 0.958454    | 0.004   |
| 210357_s_at | hypothetical protein                                                                                | 0.953514    | 0.004   |
| 207040_s_at | suppression of tumorigenicity 13 (colon carcinoma) (Hsp70 interacting protein)                      | 0.950795    | 0.004   |
| 201178_at   | F-box only protein 7                                                                                | 0.946218    | 0.004   |
| 204271_s_at | endothelin receptor type B                                                                          | 0.945601    | 0.004   |
| 212018_s_at | DKFZP564M182 protein                                                                                | 0.943323    | 0.004   |
| 200811_at   | cold inducible RNA binding protein                                                                  | 0.951932    | 0.005   |
| 202454_s_at | v-erb-b2 erythroblastic leukemia viral oncogene homolog 3 (avian)                                   | 0.928209    | 0.005   |
| 208717_at   | oxidase (cytochrome c) assembly 1-like                                                              | 0.928969    | 0.006   |
| 31835_at    | histidine-rich glycoprotein                                                                         | 0.926137    | 0.006   |
| 206701_x_at | endothelin receptor type B                                                                          | 0.925976    | 0.006   |
| 200005_at   | eukaryotic translation initiation factor 3, subunit 7 (zeta, 66/67kD)                               | 0.923322    | 0.006   |
| 208319_s_at | RNA binding motif protein 3                                                                         | 0.93197     | 0.007   |
| 213446_s_at | IQ motif containing GTPase activating protein 1                                                     | 0.92619     | 0.007   |
| 217354_s_at | calcium channel, voltage-dependent, gamma subunit 2                                                 | 0.92418     | 0.007   |
| 217530_at   |                                                                                                     | 0.921495    | 0.007   |
| 63305_at    | PBX/knotted 1 homeobox 2                                                                            | 0.920606    | 0.007   |
| 212361_s_at | ATPase, Ca <sup>++</sup> transporting, cardiac muscle, slow twitch 2                                | 0.932176    | 0.008   |
| 213817_at   |                                                                                                     | 0.929063    | 0.008   |

|             |                                                                                        |          |       |
|-------------|----------------------------------------------------------------------------------------|----------|-------|
| 219578_s_at | cytoplasmic polyadenylation element binding protein                                    | 0.92445  | 0.008 |
| 201635_s_at | fragile X mental retardation, autosomal homolog 1                                      | 0.930481 | 0.009 |
| 205535_s_at | BH-protocadherin (brain-heart)                                                         | 0.926768 | 0.009 |
| 215945_s_at | tripartite motif-containing 2                                                          | 0.91736  | 0.009 |
| 213854_at   | synaptogyrin 1                                                                         | 0.935979 | 0.01  |
| 202475_at   |                                                                                        | 0.935009 | 0.01  |
| 201734_at   | chloride channel 3                                                                     | 0.929102 | 0.01  |
| 200972_at   | tetraspan 3                                                                            | 0.918361 | 0.011 |
| 213725_x_at |                                                                                        | 0.917605 | 0.011 |
| 209185_s_at | insulin receptor substrate 2                                                           | 0.916226 | 0.011 |
| 210470_x_at | non-POU-domain-containing, octamer-binding                                             | 0.912525 | 0.011 |
| 209118_s_at | tubulin, alpha 3                                                                       | 0.913627 | 0.012 |
| 218561_s_at | CGI-203 protein                                                                        | 0.908361 | 0.012 |
| 214046_at   |                                                                                        | 0.914242 | 0.013 |
| 207236_at   | zinc finger protein 345                                                                | 0.913669 | 0.013 |
| 206913_at   | bile acid Coenzyme A: amino acid N-acyltransferase (glycine N-choloyltransferase)      | 0.907673 | 0.013 |
| 202412_s_at | ubiquitin specific protease 1                                                          | 0.932244 | 0.014 |
| 208931_s_at | interleukin enhancer binding factor 3, 90kD                                            | 0.911572 | 0.014 |
| 201982_s_at | pregnancy-associated plasma protein A                                                  | 0.910563 | 0.014 |
| 203417_at   | microfibrillar-associated protein 2                                                    | 0.908614 | 0.014 |
| 58780_s_at  | hypothetical protein FLJ10357                                                          | 0.90837  | 0.014 |
| 203657_s_at | cathepsin F                                                                            | 0.909389 | 0.015 |
| 217886_at   | epidermal growth factor receptor pathway substrate 15                                  | 0.932524 | 0.016 |
| 202993_at   | ilvB (bacterial acetolactate synthase)-like heterogeneous nuclear ribonucleoprotein H1 | 0.905077 | 0.016 |
| 201031_s_at | (H)                                                                                    | 0.902419 | 0.016 |
| 205337_at   |                                                                                        | 0.905207 | 0.017 |
| 212261_at   | trinucleotide repeat containing 15                                                     | 0.903697 | 0.017 |
| 206645_s_at | nuclear receptor subfamily 0, group B, member 1                                        | 0.903083 | 0.017 |
| 201416_at   | SRY (sex determining region Y)-box 4                                                   | 0.90129  | 0.018 |
| 209789_at   | coronin, actin binding protein, 2B                                                     | 0.900728 | 0.018 |
| 220474_at   | solute carrier family 25 (mitochondrial oxodicarboxylate carrier), member 21           | 0.898865 | 0.018 |
| 207323_s_at | myelin basic protein                                                                   | 0.898588 | 0.018 |
| 204490_s_at | CD44 antigen (homing function and Indian blood group system)                           | 0.897909 | 0.018 |
| 215266_at   | hypothetical protein DKFZp434N074                                                      | 0.894685 | 0.018 |

|                                                                                                                                                     |          |       |
|-----------------------------------------------------------------------------------------------------------------------------------------------------|----------|-------|
| AFFX-BioB-5_at                                                                                                                                      | 0.899179 | 0.019 |
| 202975_s_at KIAA0878 protein                                                                                                                        | 0.895783 | 0.019 |
| 213564_x_at lactate dehydrogenase B                                                                                                                 | 0.893949 | 0.019 |
| 220193_at hypothetical protein FLJ22938                                                                                                             | 0.893499 | 0.019 |
| 212746_s_at KIAA0470 gene product                                                                                                                   | 0.899723 | 0.02  |
| 204653_at transcription factor AP-2 alpha (activating enhancer binding protein 2 alpha) chondroitin sulfate proteoglycan                            | 0.896881 | 0.02  |
| 91920_at BEHAB/brevican                                                                                                                             | 0.896098 | 0.02  |
| 203587_at ADP-ribosylation factor 4-like                                                                                                            | 0.894923 | 0.02  |
| 211728_s_at hyaluronoglucosaminidase 3                                                                                                              | 0.892751 | 0.02  |
| 212070_at G protein-coupled receptor 56                                                                                                             | 0.891706 | 0.02  |
| 202976_s_at KIAA0878 protein                                                                                                                        | 0.891169 | 0.02  |
| 213047_x_at SET translocation (myeloid leukemia-associated)                                                                                         | 0.890923 | 0.02  |
| 201050_at similar to vaccinia virus HindIII K4L ORF chondroitin sulfate proteoglycan                                                                | 0.892127 | 0.021 |
| 219107_at BEHAB/brevican                                                                                                                            | 0.887016 | 0.026 |
| 214724_at KIAA1735 protein                                                                                                                          | 0.884387 | 0.027 |
| 205029_s_at fatty acid binding protein 7, brain CD59 antigen p18-20 (antigen identified by monoclonal antibodies 16.3A5, EJ16, EJ30, EL32 and G344) | 0.883224 | 0.027 |
| 200985_s_at EL32 and G344)                                                                                                                          | 0.882335 | 0.027 |
| 209563_x_at calmodulin 2 (phosphorylase kinase, delta)                                                                                              | 0.887328 | 0.028 |
| 214730_s_at Golgi apparatus protein 1                                                                                                               | 0.884493 | 0.028 |
| 214500_at H2A histone family, member Y                                                                                                              | 0.882136 | 0.028 |
| 201417_at                                                                                                                                           | 0.887357 | 0.029 |
| 201046_s_at RAD23 homolog A (S. cerevisiae)                                                                                                         | 0.884712 | 0.029 |
| 213900_at Friedreich ataxia region gene X123                                                                                                        | 0.881244 | 0.029 |
| 220753_s_at lambda-crystallin                                                                                                                       | 0.88061  | 0.029 |
| 218211_s_at melanophilin                                                                                                                            | 0.880119 | 0.029 |
| 201101_s_at KIAA0164 gene product                                                                                                                   | 0.887742 | 0.031 |
| 201380_at cartilage associated protein                                                                                                              | 0.885436 | 0.032 |
| 49111_at                                                                                                                                            | 0.88526  | 0.032 |
| 211937_at eukaryotic translation initiation factor 4B                                                                                               | 0.884939 | 0.032 |
| 213516_at lymphoid blast crisis oncogene                                                                                                            | 0.878349 | 0.033 |
| 205372_at pleiomorphic adenoma gene 1                                                                                                               | 0.878605 | 0.035 |
| 209184_s_at insulin receptor substrate 2                                                                                                            | 0.877252 | 0.037 |
| 205188_s_at MAD, mothers against decapentaplegic homolog 5 (Drosophila)                                                                             | 0.858837 | 0.037 |
| 200810_s_at cold inducible RNA binding protein                                                                                                      | 0.858558 | 0.037 |
| 219046_s_at PBX/knotted 1 homeobox 2                                                                                                                | 0.858392 | 0.037 |
| 203548_s_at lipoprotein lipase                                                                                                                      | 0.87599  | 0.038 |
| 212114_at                                                                                                                                           | 0.859012 | 0.038 |

|             |                                                |          |       |
|-------------|------------------------------------------------|----------|-------|
|             | retinal short-chain dehydrogenase/reductase    |          |       |
| 217989_at   | retSDR2                                        | 0.85127  | 0.038 |
| 202341_s_at | tripartite motif-containing 2                  | 0.851217 | 0.038 |
| 219831_at   | cyclin-dependent kinase-like 3                 | 0.849561 | 0.038 |
| 220927_s_at | heparanase-like protein                        | 0.849166 | 0.038 |
| 210493_s_at |                                                | 0.848502 | 0.038 |
| 219376_at   | hypothetical protein FLJ23393                  | 0.874143 | 0.039 |
|             | translocase of inner mitochondrial membrane    |          |       |
| 218316_at   | 9 homolog (yeast)                              | 0.873713 | 0.039 |
| 209515_s_at | RAB27A, member RAS oncogene family             | 0.870522 | 0.039 |
| 211520_s_at | glutamate receptor, ionotropic, AMPA 1         | 0.870307 | 0.039 |
| 219114_at   | g20 protein                                    | 0.864071 | 0.039 |
|             | MADS box transcription enhancer factor 2,      |          |       |
| 209199_s_at | polypeptide C (myocyte enhancer factor 2C)     | 0.864012 | 0.039 |
| 214739_at   | hypothetical protein MGC4126                   | 0.863715 | 0.039 |
| 204105_s_at | neuronal cell adhesion molecule                | 0.863197 | 0.039 |
| 213543_at   |                                                | 0.862624 | 0.039 |
| 215146_s_at | KIAA1043 protein                               | 0.861997 | 0.039 |
| 220261_s_at | hypothetical protein FLJ10479                  | 0.8618   | 0.039 |
|             | glutamine-fructose-6-phosphate                 |          |       |
| 205100_at   | transaminase 2                                 | 0.861232 | 0.039 |
| 211876_x_at | protocadherin gamma subfamily A, 11            | 0.859347 | 0.039 |
|             | solute carrier family 19 (folate transporter), |          |       |
| 211576_s_at | member 1                                       | 0.859035 | 0.039 |
| 209672_s_at | hypothetical protein                           | 0.854843 | 0.039 |
|             | phosphorylase, glycogen; liver (Hers disease,  |          |       |
| 202990_at   | glycogen storage disease type VI)              | 0.852225 | 0.039 |
| 200701_at   | Niemann-Pick disease, type C2 gene             | 0.851336 | 0.039 |
| 222145_at   |                                                | 0.850919 | 0.039 |
|             | hypothetical gene supported by AF038182;       |          |       |
| 221823_at   | BC009203                                       | 0.850219 | 0.039 |
| 216512_s_at |                                                | 0.849388 | 0.039 |
| 218841_at   | hypothetical protein MGC5540                   | 0.847755 | 0.039 |
|             | FERM, RhoGEF (ARHGEF) and pleckstrin           |          |       |
| 201910_at   | domain protein 1 (chondrocyte-derived)         | 0.846595 | 0.039 |
| 214890_s_at | DKFZP564J102 protein                           | 0.845768 | 0.039 |
| 216375_s_at | ets variant gene 5 (ets-related molecule)      | 0.845112 | 0.039 |
|             | v-rel reticuloendotheliosis viral oncogene     |          |       |
|             | homolog A, nuclear factor of kappa light       |          |       |
|             | polypeptide gene enhancer in B-cells 3, p65    |          |       |
| 209878_s_at | (avian)                                        | 0.844985 | 0.039 |
| 207842_s_at | MLN51 protein                                  | 0.84498  | 0.039 |
| 218457_s_at | DNA (cytosine-5-)-methyltransferase 3 alpha    | 0.844665 | 0.039 |
| 210613_s_at | synaptogyrin 1                                 | 0.874532 | 0.04  |

|             |                                                                                                           |          |       |
|-------------|-----------------------------------------------------------------------------------------------------------|----------|-------|
| 200707_at   | protein kinase C substrate 80K-H                                                                          | 0.864363 | 0.04  |
| 209859_at   | tripartite motif-containing 9                                                                             | 0.86301  | 0.04  |
| 213452_at   | zinc finger protein 184 (Kruppel-like)<br>aldehyde dehydrogenase 7 family, member                         | 0.855515 | 0.04  |
| 213591_at   | A1                                                                                                        | 0.85515  | 0.04  |
| 207170_s_at | DKFZP586A011 protein                                                                                      | 0.853579 | 0.04  |
| 213063_at   |                                                                                                           | 0.852748 | 0.04  |
| 212936_at   |                                                                                                           | 0.852449 | 0.04  |
| 203697_at   | frizzled-related protein                                                                                  | 0.846031 | 0.04  |
| 216112_at   |                                                                                                           | 0.845886 | 0.04  |
| 222297_x_at | ribosomal protein L18                                                                                     | 0.844504 | 0.04  |
| 214464_at   | Ser-Thr protein kinase related to the<br>myotonic dystrophy protein kinase                                | 0.844379 | 0.04  |
| 209162_s_at | PRP4/STK/WD splicing factor<br>general transcription factor IIF, polypeptide 1                            | 0.840095 | 0.04  |
| 202356_s_at | (74kD subunit)                                                                                            | 0.839953 | 0.04  |
| 208974_x_at | karyopherin (importin) beta 1                                                                             | 0.839859 | 0.04  |
| 214154_s_at | plakophilin 2                                                                                             | 0.83907  | 0.04  |
| 205202_at   | protein-L-isoaspartate (D-aspartate) O-<br>methyltransferase                                              | 0.838986 | 0.04  |
| 203139_at   | death-associated protein kinase 1<br>fasciculation and elongation protein zeta 1                          | 0.876579 | 0.041 |
| 203562_at   | (zygin I)                                                                                                 | 0.870968 | 0.041 |
| 210517_s_at | A kinase (PRKA) anchor protein (gravin) 12                                                                | 0.870631 | 0.041 |
| 40640_at    | arylsulfatase A<br>G protein-coupled receptor, family C, group                                            | 0.868854 | 0.041 |
| 203632_s_at | 5, member B                                                                                               | 0.865927 | 0.041 |
| 206479_at   | melastatin 1                                                                                              | 0.865683 | 0.041 |
| 217853_at   | tumor endothelial marker 6<br>solute carrier family 6 (neurotransmitter                                   | 0.865437 | 0.041 |
| 213843_x_at | transporter, creatine), member 8                                                                          | 0.865317 | 0.041 |
| 212419_at   |                                                                                                           | 0.860383 | 0.041 |
| 218228_s_at | tankyrase, TRF1-interacting ankyrin-related<br>ADP-ribose polymerase 2                                    | 0.860381 | 0.041 |
| 200030_s_at | solute carrier family 25 (mitochondrial carrier;<br>phosphate carrier), member 3                          | 0.855859 | 0.041 |
| 210916_s_at |                                                                                                           | 0.855229 | 0.041 |
| 212776_s_at | KIAA0657 protein<br>CD36 antigen (collagen type I receptor,<br>thrombospondin receptor)-like 2 (lysosomal | 0.853712 | 0.041 |
| 201647_s_at | integral membrane protein II)<br>Fc fragment of IgG, receptor, transporter,                               | 0.851666 | 0.041 |
| 218831_s_at | alpha                                                                                                     | 0.851389 | 0.041 |
| 207469_s_at | Pirin                                                                                                     | 0.847035 | 0.041 |



|             |                                                                                                             |          |       |
|-------------|-------------------------------------------------------------------------------------------------------------|----------|-------|
| 201089_at   | ATPase, H <sup>+</sup> transporting, lysosomal (vacuolar proton pump), beta polypeptide, 56/58kD, isoform 2 | 0.846828 | 0.041 |
| 201671_x_at | ubiquitin specific protease 14 (tRNA-guanine transglycosylase)                                              | 0.845122 | 0.041 |
| 221204_s_at | cartilage acidic protein 1                                                                                  | 0.843208 | 0.041 |
| 219394_at   | Phosphatidylglycerophosphate Synthase                                                                       | 0.843126 | 0.041 |
| 218213_s_at | chromosome 11 open reading frame 10                                                                         | 0.842591 | 0.041 |
| 217613_at   |                                                                                                             | 0.841753 | 0.041 |
| 217887_s_at | epidermal growth factor receptor pathway substrate 15                                                       | 0.84015  | 0.041 |
| 220974_x_at | similar to rat tricarboxylate carrier-like protein protein-L-isoaspartate (D-aspartate) O-                  | 0.838575 | 0.041 |
| 208857_s_at | methyltransferase                                                                                           | 0.876099 | 0.042 |
| 213763_at   |                                                                                                             | 0.87455  | 0.042 |
| 203042_at   | lysosomal-associated membrane protein 2                                                                     | 0.872363 | 0.042 |
| 216048_s_at | KIAA0878 protein                                                                                            | 0.871    | 0.042 |
| 218450_at   | heme binding protein 1                                                                                      | 0.868135 | 0.042 |
| 201923_at   | peroxiredoxin 4                                                                                             | 0.867464 | 0.042 |
| 216295_s_at |                                                                                                             | 0.867395 | 0.042 |
| 221234_s_at | BTB and CNC homology 1, basic leucine zipper transcription factor 2                                         | 0.867321 | 0.042 |
| 217777_s_at | butyrate-induced transcript 1                                                                               | 0.866611 | 0.042 |
| 219001_s_at | hypothetical protein MGC10765                                                                               | 0.866007 | 0.042 |
| 214751_at   |                                                                                                             | 0.864645 | 0.042 |
| 202219_at   | solute carrier family 6 (neurotransmitter transporter, creatine), member 8                                  | 0.864441 | 0.042 |
| 212263_at   | homolog of mouse quaking QKI (KH domain RNA binding protein)                                                | 0.859435 | 0.042 |
| 202179_at   | bleomycin hydrolase                                                                                         | 0.856247 | 0.042 |
| 208213_s_at | potassium voltage-gated channel, shaker-related subfamily, beta member 1                                    | 0.856238 | 0.042 |
| 47550_at    | leucine zipper, putative tumor suppressor 1                                                                 | 0.856106 | 0.042 |
| 205353_s_at | prostatic binding protein                                                                                   | 0.85401  | 0.042 |
| 209856_x_at | abl-interactor 12 (SH3-containing protein)                                                                  | 0.852863 | 0.042 |
| 209737_at   | atrophin-1 interacting protein 1; activin receptor interacting protein 1                                    | 0.84324  | 0.042 |
| 202192_s_at | growth arrest-specific 7                                                                                    | 0.841928 | 0.042 |
| 213818_x_at | collagen, type V, alpha 1                                                                                   | 0.838269 | 0.042 |
| 203329_at   | protein tyrosine phosphatase, receptor type, M                                                              | 0.867882 | 0.043 |
| 212094_at   | paternally expressed 10                                                                                     | 0.859515 | 0.043 |
| 202967_at   | glutathione S-transferase A4                                                                                | 0.853883 | 0.043 |
| 218594_at   | hypothetical protein FLJ10359                                                                               | 0.840508 | 0.043 |

|             |                                                                             |          |       |
|-------------|-----------------------------------------------------------------------------|----------|-------|
| 201306_s_at | acidic protein rich in leucines                                             | 0.840395 | 0.043 |
| 200840_at   | lysyl-tRNA synthetase                                                       | 0.840373 | 0.043 |
| 212398_at   | radixin                                                                     | 0.83763  | 0.043 |
| 40148_at    | amyloid beta (A4) precursor protein-binding, family B, member 2 (Fe65-like) | 0.837249 | 0.043 |
| 214039_s_at | putative integral membrane transporter                                      | 0.874634 | 0.044 |
| 221644_s_at | AIM-1 protein                                                               | 0.871668 | 0.044 |
| 215074_at   | myosin IB                                                                   | 0.871112 | 0.044 |
| 206426_at   | melan-A                                                                     | 0.840705 | 0.045 |
| 200645_at   | GABA(A) receptor-associated protein                                         | 0.837255 | 0.045 |
| 220617_s_at | hypothetical protein FLJ10697                                               | 0.836003 | 0.045 |
| 216032_s_at | serologically defined breast cancer antigen 84                              | 0.835737 | 0.045 |
| 214042_s_at |                                                                             | 0.836483 | 0.046 |
| 218251_at   | hypothetical protein STRAIT11499                                            | 0.835766 | 0.046 |
| 213981_at   | catechol-O-methyltransferase                                                | 0.835388 | 0.046 |
| 202629_at   | amyloid beta precursor protein (cytoplasmic tail) binding protein 2         | 0.835351 | 0.046 |
| 212352_s_at |                                                                             | 0.833417 | 0.046 |
| 202554_s_at | glutathione S-transferase M3 (brain)                                        | 0.833964 | 0.047 |
| 218220_at   | MYG1 protein                                                                | 0.832766 | 0.047 |
| 202236_s_at | solute carrier family 16 (monocarboxylic acid transporters), member 1       | 0.832679 | 0.047 |
| 215152_at   | v-myb myeloblastosis viral oncogene homolog (avian)                         | 0.830679 | 0.047 |
| 33148_at    | zinc finger RNA binding protein                                             | 0.834432 | 0.048 |
| 203698_s_at | frizzled-related protein                                                    | 0.833765 | 0.048 |
| 220361_at   | hypothetical protein FLJ12476                                               | 0.833687 | 0.048 |
| 208027_s_at |                                                                             | 0.83368  | 0.048 |
| 215318_at   | hypothetical gene CG012                                                     | 0.832432 | 0.048 |
| 219450_at   | hypothetical protein FLJ11017                                               | 0.830702 | 0.048 |
| 201919_at   | hypothetical protein FLJ10618                                               | 0.829874 | 0.048 |
| 201002_s_at | ubiquitin-conjugating enzyme E2 variant 1                                   | 0.829588 | 0.048 |
| 209434_s_at | phosphoribosyl pyrophosphate amidotransferase                               | 0.831385 | 0.049 |
| 221197_s_at | choline acetyltransferase                                                   | 0.830122 | 0.049 |
| 203662_s_at | tropomodulin                                                                | 0.829734 | 0.049 |
| 214879_x_at | upstream transcription factor 2, c-fos interacting                          | 0.828896 | 0.049 |
| 203316_s_at | small nuclear ribonucleoprotein polypeptide E                               | 0.828806 | 0.049 |
| 219905_at   | erythroblast membrane-associated protein                                    | 0.828185 | 0.049 |
| 212892_at   | zinc finger protein 282                                                     | 0.827964 | 0.049 |
| 211623_s_at | casein kinase 2, beta polypeptide                                           | 0.827885 | 0.049 |
| 202246_s_at | cyclin-dependent kinase 4                                                   | 0.827297 | 0.049 |

|             |                                                        |         |       |
|-------------|--------------------------------------------------------|---------|-------|
| 211774_s_at | DKFZP564I122 protein                                   | 0.82698 | 0.049 |
| 220201_at   | olfactory receptor, family 1, subfamily K,<br>member 1 | 0.81166 | 0.049 |

### *Estimation of the frequency of metastasis-enabling alterations*

Under the assumption that the ability to metastasize is acquired by the Mel-STR melanoma cells after injection into the host animal, we estimate a conservative lower bound on the frequency with which such an alteration must occur in order to give rise to our observed data.

Let  $N_0$  be the number of tumor cells that survive the initial subcutaneous injection. The results of the tumor resection experiments indicate that numerous metastatic cells have already been seeded in the lungs within the 18 days after the initial injection. Thus, the total number of elapsed cell divisions prior to seeding metastasis depends on  $N_0$  and  $N_f$ , where  $N_f$  is the number of cancer cells in the tumor mass at the time of surgical resection. Given the size of the primary tumors at the time of resection, we can estimate that  $N_f = 10^7$ . Therefore,  $\alpha = \log_2 (N_f/N_0)$ , where  $\alpha$  is the number of population doublings that occur *in vivo* prior to surgical resection of the primary tumor mass. Since  $10^3$  injected Mel-STR cells are sufficient to form a primary Mel-STR tumor (data not shown) we can infer that the frequency of injected cells that survive is  $> 10^{-3}$ . It follows that  $N_0 > 10^3$ , and therefore  $\alpha < \log_2 (10^7/10^3) = \log_2 (10^4) < 14$ . This, in turn, implies that the total number of individual cellular divisions (a quantity distinct from population doublings) that elapse prior to surgical resection of the primary tumor is less than

$$[(N_0) + (2)(N_0) + (2^2)(N_0) + (2^3)(N_0) + \dots + (2^{\alpha-1})(N_0)] = (2^\alpha - 1)(N_0)$$

It follows that the total number of conversions *in vivo* from a non-metastatic clone to a metastatic clone is at most  $(2^\alpha - 1)(N_0)(p)$ , where  $p$  is the probability that a non-metastatic cell becomes metastatic after a single division. Assuming that such a conversion event

will occur with equal probability in any of the  $(2^\alpha - 1)(N_0)$  cell divisions that occur *in vivo*, one can determine that the average number of cellular descendants derived from a newly formed metastatic cell is  $\alpha$ . Thus, the total number of metastatic cells in the primary tumor mass at the moment of surgical resection is at most  $(2^\alpha - 1)(N_0)(p)(\alpha)$ .

The expected number of metastatic nodules in the lungs at the endpoint of the experiment can be calculated as:

$$\begin{aligned} & \text{(number of metastasis-competent cells released into the circulation before resection)} \times \\ & \text{(the probability that a metastasis-competent cell released into the circulation will} \\ & \text{ultimately form a visible nodule in the lung)} \end{aligned}$$

The second quantity in the product above can be estimated to be less than one in  $10^5$  cells, since the injection of  $10^5$  Mel-STR cells directly into the murine tail-vein failed to yield any visible lung metastases after a 2 month period (data not shown). The first quantity in the product above clearly depends on the number of tumor cells that are shed daily into the circulation. For a  $\approx 1$ g tumor, this number has been previously estimated to be  $10^6$  cells per day<sup>43</sup>. Therefore,

$$(10^6 \text{ cancer cells shed per day}) \times (18 \text{ days}) \times$$

$[(2^\alpha - 1)(N_0)(p)(\alpha) \text{ metastatic cells in the tumor}] \div [N_f \text{ total cancer cells in the tumor}]$  is a conservative upper bound on the total number of metastatic cells released into the circulation prior to surgical resection of the primary tumor mass. This number is  $\approx (2 \times 10^7)(p)(\alpha)$ . As discussed above, it follows that

$$(10^{-5})(2 \times 10^7)(p)(\alpha) < (10^{-5})(2 \times 10^7)(p)(15) = 3000p$$

is an upper bound on the expected number of lung nodules at the endpoint of the experiment. Since greater than 30 metastatic nodules were observed in the mouse lungs at the endpoint of the tumor resection experiments, we have that

$3000p > 30$  or  $p > 1/100$

This frequency is significantly higher than known rates of genomic mutation.
